# Supplementary material for: Large optical polarizability causing positive effects on the birefringence of planar-triangular BO3groups in ternary borates
Source: Royal Society of Chemistry journal article supplement (doi:10.1039/d0dt00155d), 2020-01-01
Supplement: d0dt00155d1.pdf [file d0dt00155d1.pdf]

*Electronic Supplementary Information:*

## Large Optical Polarizability Causing Positive Effects on Birefringence of Planar-Triangular BO<sub>3</sub> Groups in Ternary Borates

Xinyuan Zhou,<sup>#a</sup> Junben Huang,<sup>#b</sup> Gemei Cai,<sup>\*b</sup> Hengwei Zhou,<sup>a</sup> Yineng Huang<sup>\*a</sup> and Xin Su<sup>\*a</sup>

<sup>a</sup> Xinjiang Laboratory of Phase Transitions and Microstructures in Condensed Matter Physics, College of Physical Science and Technology, Yili Normal University, Yining, Xinjiang 835000, China.

<sup>b</sup> School of Materials Science and Engineering, Education Ministry Key Laboratory of Non-ferrous Materials Science and Engineering, Central South University, Changsha 410083, Hunan, China.

\*Corresponding author E-mail: caigemei@csu.edu.cn.

\*Corresponding author E-mail: ynhuang@nju.edu.cn.

\*Corresponding author E-mail: suxin\_phy@sina.com.

# These authors contributed equally.

### Contents

**Table S1** Summary of crystallographic data of 14 ternary borates containing  $d^{10}$  configuration cations.

**Table S2** Space groups, calculated band gaps and birefringence values  $\Delta n$  of ternary borates  $\alpha$ -/ $\beta$ -TM<sub>3</sub>(BO<sub>3</sub>)<sub>2</sub> (TM = Zn, Cd), Hg<sub>3</sub>(BO<sub>3</sub>)<sub>2</sub>,  $\alpha$ -/ $\beta$ -TMB<sub>4</sub>O<sub>7</sub> (TM = Zn, Hg), CdB<sub>4</sub>O<sub>7</sub>, Cd<sub>2</sub>B<sub>2</sub>O<sub>5</sub>, and M<sub>3</sub>(BO<sub>3</sub>)<sub>2</sub> (M = Mg, Ca, Sr).

**Table S3** Mulliken charge population of different atoms in ternary borates  $\alpha$ -/ $\beta$ -TM<sub>3</sub>(BO<sub>3</sub>)<sub>2</sub> (TM = Zn, Cd), Hg<sub>3</sub>(BO<sub>3</sub>)<sub>2</sub>,  $\alpha$ -/ $\beta$ -TMB<sub>4</sub>O<sub>7</sub> (TM = Zn, Hg), CdB<sub>4</sub>O<sub>7</sub>, Cd<sub>2</sub>B<sub>2</sub>O<sub>5</sub>, and M<sub>3</sub>(BO<sub>3</sub>)<sub>2</sub> (M = Mg, Ca, Sr).

**Table S4** Calculated dipole moment ( $\mathbf{P}$ ), anisotropy polarizability ( $\Delta\alpha$ ), largest hyperpolarizability tensor

( $\beta_{\max}$ ) and HOMO-LUMO gap of B-O groups  $\text{BO}_3$ ,  $\text{BO}_4$ , and  $\text{B}_2\text{O}_5$ .

**Table S5** Calculated Born effective charges of ternary borates  $\alpha$ -/ $\beta$ - $\text{TM}_3(\text{BO}_3)_2$  (TM = Zn, Cd),  $\text{Cd}_2\text{B}_2\text{O}_5$ , and  $\text{M}_3(\text{BO}_3)_2$  (M = Hg, Mg, Ca, Sr).

**Table S6** Calculated optical permittivity and polarisabilities ( $f \rightarrow \infty$ ) of ternary borates  $\alpha$ -/ $\beta$ - $\text{TM}_3(\text{BO}_3)_2$  (TM = Zn, Cd),  $\text{Cd}_2\text{B}_2\text{O}_5$ , and  $\text{M}_3(\text{BO}_3)_2$  (M = Hg, Mg, Ca, Sr).

**Table S7** The  $\text{BO}_3$  groups density (N/V) of ternary borates  $\alpha$ -/ $\beta$ - $\text{TM}_3(\text{BO}_3)_2$  (TM = Zn, Cd),  $\text{Cd}_2\text{B}_2\text{O}_5$ , and  $\text{M}_3(\text{BO}_3)_2$  (M = Hg, Mg, Ca, Sr).

**Figure S1** Crystal structures of ternary borates  $\alpha$ - $\text{Zn}_3(\text{BO}_3)_2$  (a),  $\beta$ - $\text{Zn}_3(\text{BO}_3)_2$  (b),  $\alpha$ - $\text{ZnB}_4\text{O}_7$  (c),  $\beta$ - $\text{ZnB}_4\text{O}_7$  (d),  $\alpha$ - $\text{Cd}_3(\text{BO}_3)_2$  (e),  $\beta$ - $\text{Cd}_3(\text{BO}_3)_2$  (f),  $\text{Cd}_2\text{B}_2\text{O}_5$  (g),  $\text{CdB}_4\text{O}_7$  (h),  $\text{Hg}_3(\text{BO}_3)_2$  (i),  $\alpha$ - $\text{HgB}_4\text{O}_7$  (j),  $\beta$ - $\text{HgB}_4\text{O}_7$  (k), and  $\text{M}_3(\text{BO}_3)_2$  (M = Mg, Ca, Sr) (l-n).

**Figure S2** Calculated band structures for ternary borates  $\alpha$ - $\text{Zn}_3(\text{BO}_3)_2$  (a),  $\beta$ - $\text{Zn}_3(\text{BO}_3)_2$  (b),  $\alpha$ - $\text{ZnB}_4\text{O}_7$  (c),  $\beta$ - $\text{ZnB}_4\text{O}_7$  (d),  $\alpha$ - $\text{Cd}_3(\text{BO}_3)_2$  (e),  $\beta$ - $\text{Cd}_3(\text{BO}_3)_2$  (f),  $\text{Cd}_2\text{B}_2\text{O}_5$  (g),  $\text{CdB}_4\text{O}_7$  (h),  $\text{Hg}_3(\text{BO}_3)_2$  (i),  $\alpha$ - $\text{HgB}_4\text{O}_7$  (j),  $\beta$ - $\text{HgB}_4\text{O}_7$  (k), and  $\text{M}_3(\text{BO}_3)_2$  (M = Mg, Ca, Sr) (l-n) by GGA functional, all of borates calculated band gaps by the GGA and HSE06 functional (o).

**Figure S3** Density/partial density of states of ternary borates  $\alpha$ - $\text{Zn}_3(\text{BO}_3)_2$  (a),  $\beta$ - $\text{Zn}_3(\text{BO}_3)_2$  (b),  $\alpha$ - $\text{ZnB}_4\text{O}_7$  (c),  $\beta$ - $\text{ZnB}_4\text{O}_7$  (d),  $\alpha$ - $\text{Cd}_3(\text{BO}_3)_2$  (e),  $\beta$ - $\text{Cd}_3(\text{BO}_3)_2$  (f),  $\text{Cd}_2\text{B}_2\text{O}_5$  (g),  $\text{CdB}_4\text{O}_7$  (h),  $\text{Hg}_3(\text{BO}_3)_2$  (i),  $\alpha$ - $\text{HgB}_4\text{O}_7$  (j),  $\beta$ - $\text{HgB}_4\text{O}_7$  (k), and  $\text{M}_3(\text{BO}_3)_2$  (M = Mg, Ca, Sr) (l-n).

**Figure S4** Ternary borates  $\alpha$ -/ $\beta$ - $\text{TM}_3(\text{BO}_3)_2$  (TM = Zn, Cd),  $\text{Cd}_2\text{B}_2\text{O}_5$ , and  $\text{M}_3(\text{BO}_3)_2$  (M = Hg, Mg, Ca, Sr): compared with the HSE06 band gaps (a) and O (2p) bandwidth (b).

**Figure S5** Calculated birefringence  $\Delta n$  of ternary borates  $\alpha$ - $\text{Zn}_3(\text{BO}_3)_2$  (a),  $\beta$ - $\text{Zn}_3(\text{BO}_3)_2$  (b),  $\alpha$ - $\text{ZnB}_4\text{O}_7$  (c),  $\beta$ - $\text{ZnB}_4\text{O}_7$  (d),  $\alpha$ - $\text{Cd}_3(\text{BO}_3)_2$  (e),  $\beta$ - $\text{Cd}_3(\text{BO}_3)_2$  (f),  $\text{Cd}_2\text{B}_2\text{O}_5$  (g),  $\text{CdB}_4\text{O}_7$  (h),  $\text{Hg}_3(\text{BO}_3)_2$  (i),  $\alpha$ - $\text{HgB}_4\text{O}_7$

(j),  $\beta$ - $\text{HgB}_4\text{O}_7$  (k), and  $\text{M}_3(\text{BO}_3)_2$  (M = Mg, Ca, Sr) (l-n).

**Figure S6** Borates  $\alpha$ - $\text{Cd}_3(\text{BO}_3)_2$  and  $\text{Cd}_2\text{B}_2\text{O}_5$ : IR spectra and thermal analysis. (a) and (b) are IR and thermal of  $\alpha$ - $\text{Cd}_3(\text{BO}_3)_2$ , (c) and (d) are those of  $\text{Cd}_2\text{B}_2\text{O}_5$ .

**Figure S7** Calculated IR spectra of  $\alpha$ - $\text{Cd}_3(\text{BO}_3)_2$  (a) and  $\text{Cd}_2\text{B}_2\text{O}_5$  (b).

**Table S1** Summary of crystallographic data of 14 ternary borates containing  $d^{10}$  configuration cations.

| Compounds                                                         | Space group               | Crystallographic data                                  |                                                                   | ICSD number     |
|-------------------------------------------------------------------|---------------------------|--------------------------------------------------------|-------------------------------------------------------------------|-----------------|
|                                                                   |                           | $a, b, c$ (Å)                                          | $\alpha, \beta, \gamma$ (°)                                       |                 |
| $\text{Cd}_2\text{B}_2\text{O}_5$ <sup>[1]</sup>                  | <i>P</i> -1               | $a = 3.4414(3), b = 6.3570(6),$<br>$c = 9.9389(9)$     | $\alpha = 105.474(6), \beta =$<br>$90.842(6), \gamma = 91.969(6)$ | 238992-<br>ICSD |
| $\alpha$ -<br>$\text{Zn}_4\text{O}(\text{BO}_3)_2$ <sup>[2]</sup> | <i>I</i> -43 <i>m</i>     | $a = b = c = 7.480(3)$                                 | $\alpha = \beta = \gamma = 90$                                    | 261810-<br>ICSD |
| $\beta$ -<br>$\text{Zn}_4\text{O}(\text{BO}_3)_2$ <sup>[3]</sup>  | <i>R</i> -3 <i>c</i>      | $a = b = c = 9.9115(4)$                                | $\alpha = \beta = \gamma = 48.602(1)$                             | 72943-ICSD      |
| $\alpha$ - $\text{ZnB}_4\text{O}_7$ <sup>[4]</sup>                | <i>Pbca</i>               | $a = 8.1093(2), b = 8.6340(2),$<br>$c = 13.7200(3)$    | $\alpha = \beta = \gamma = 90$                                    | 424545-<br>ICSD |
| $\beta$ - $\text{ZnB}_4\text{O}_7$ <sup>[5]</sup>                 | <i>Cmcm</i>               | $a = 10.850(1), b = 6.489(1),$<br>$c = 5.173(1)$       | $\alpha = \beta = \gamma = 90$                                    | 412688-<br>ICSD |
| $\alpha$ - $\text{Zn}_3(\text{BO}_3)_2$ <sup>[6]</sup>            | <i>P</i> -1               | $a = 6.302(2), b = 8.248(1),$<br>$c = 10.020(1)$       | $\alpha = 89.85(1), \beta = 89.79(1),$<br>$\gamma = 73.25(1)$     | 155112-<br>ICSD |
| $\beta$ - $\text{Zn}_3(\text{BO}_3)_2$ <sup>[7]</sup>             | <i>C</i> 2/ <i>c</i>      | $a = 23.83041(8), b =$<br>$5.04360(3), c = 8.38073(5)$ | $\alpha = \gamma = 90, \beta = 102.95$                            | 193238-<br>ICSD |
| $\text{CdB}_2\text{O}_4$ <sup>[8]</sup>                           | <i>P</i> 63               | $a = b = 8.8521(16), c =$<br>$7.1672(8)$               | $\alpha = \beta = 90, \gamma = 120$                               | 419180-<br>ICSD |
| $\text{CdB}_4\text{O}_7$ <sup>[9]</sup>                           | <i>Pbca</i>               | $a = 8.21(1), b = 8.70(1), c =$<br>$14.18(2)$          | $\alpha = \beta = \gamma = 90$                                    | 14361-ICSD      |
| $\alpha$ -<br>$\text{Cd}_3(\text{BO}_3)_2$ <sup>[10]</sup>        | <i>Pnmm</i>               | $a = 5.9680(10), b =$<br>$4.7860(10), c = 9.012(2)$    | $\alpha = \beta = \gamma = 90$                                    | 240724-<br>ICSD |
| $\beta$ -<br>$\text{Cd}_3(\text{BO}_3)_2$ <sup>[11]</sup>         | <i>P</i> -1               | $a = 6.1114(5), b = 6.1463(5),$<br>$c = 7.4232(6)$     | $\alpha = 76.521(3), \beta =$<br>$80.730(3), \gamma = 82.461(3)$  | 427222-<br>ICSD |
| $\text{Hg}_3(\text{BO}_3)_2$ <sup>[12]</sup>                      | <i>R</i> -3 <i>c</i>      | $a = b = 8.8936(9), c =$<br>$13.052(3)$                | $\alpha = \beta = 90, \gamma = 120$                               | 409688-<br>ICSD |
| $\alpha$ - $\text{HgB}_4\text{O}_7$ <sup>[13]</sup>               | <i>Pbca</i>               | $a = 8.3994(13), b =$<br>$8.8066(6), c = 14.1370(17)$  | $\alpha = \beta = \gamma = 90$                                    | 281287-ICS      |
| $\beta$ - $\text{HgB}_4\text{O}_7$ <sup>[14]</sup>                | <i>Pmn</i> 2 <sub>1</sub> | $a = 10.656(2), b = 4.3810(9),$<br>$c = 4.1872(8)$     | $\alpha = \beta = \gamma = 90$                                    | 415347-<br>ICSD |

**Table S2** Space groups, calculated band gaps and birefringence values  $\Delta n$  of ternary borates  $\alpha$ -/ $\beta$ - $\text{TM}_3(\text{BO}_3)_2$  (TM = Zn, Cd),  $\text{Hg}_3(\text{BO}_3)_2$ ,  $\alpha$ -/ $\beta$ - $\text{TMB}_4\text{O}_7$  (TM = Zn, Hg),  $\text{CdB}_4\text{O}_7$ ,  $\text{Cd}_2\text{B}_2\text{O}_5$ , and  $\text{M}_3(\text{BO}_3)_2$  (M = Mg, Ca, Sr).

| Classification         | Compounds                               | Space group               | Band gap (eV) |                      | $\Delta n$ (@ 1064 nm) |
|------------------------|-----------------------------------------|---------------------------|---------------|----------------------|------------------------|
|                        |                                         |                           | GGA           | HSE06                |                        |
| Zn cations             | $\alpha$ - $\text{Zn}_3(\text{BO}_3)_2$ | <i>P</i> -1               | 2.98          | 4.62                 | 0.077                  |
|                        | $\beta$ - $\text{Zn}_3(\text{BO}_3)_2$  | <i>C2/c</i>               | 2.75          | 4.80 <sup>[15]</sup> | 0.078                  |
|                        | $\alpha$ - $\text{ZnB}_4\text{O}_7$     | <i>Pbca</i>               | 4.72          | 6.55                 | 0.036                  |
|                        | $\beta$ - $\text{ZnB}_4\text{O}_7$      | <i>Cmcm</i>               | 5.33          | 7.38                 | 0.025                  |
| Cd cations             | $\alpha$ - $\text{Cd}_3(\text{BO}_3)_2$ | <i>Pnmm</i>               | 2.21          | 3.04                 | 0.035                  |
|                        | $\beta$ - $\text{Cd}_3(\text{BO}_3)_2$  | <i>P</i> -1               | 2.31          | 3.16                 | 0.072                  |
|                        | $\text{Cd}_2\text{B}_2\text{O}_5$       | <i>P</i> -1               | 3.23          | 4.18                 | 0.087                  |
|                        | $\text{CdB}_4\text{O}_7$                | <i>Pbca</i>               | 4.71          | 5.67                 | 0.041                  |
| Hg cations             | $\text{Hg}_3(\text{BO}_3)_2$            | <i>R</i> -3 <i>c</i>      | 3.33          | 3.87                 | 0.239                  |
|                        | $\alpha$ - $\text{HgB}_4\text{O}_7$     | <i>Pbca</i>               | 3.22          | 4.41                 | 0.037                  |
|                        | $\beta$ - $\text{HgB}_4\text{O}_7$      | <i>Pmn</i> 2 <sub>1</sub> | 2.30          | 3.43                 | 0.021                  |
| Alkaline-earth cations | $\text{Mg}_3(\text{BO}_3)_2$            | <i>Pnmm</i>               | 5.47          | 7.15                 | 0.029                  |
|                        | $\text{Ca}_3(\text{BO}_3)_2$            | <i>R</i> -3 <i>c</i>      | 5.24          | 6.60                 | 0.105                  |
|                        | $\text{Sr}_3(\text{BO}_3)_2$            | <i>R</i> -3 <i>c</i>      | 4.81          | 6.23                 | 0.099                  |

**Table S3** Mulliken charge population of different atoms in ternary borates  $\alpha$ -/ $\beta$ - $\text{TM}_3(\text{BO}_3)_2$  (TM = Zn, Cd),  $\text{Hg}_3(\text{BO}_3)_2$ ,  $\alpha$ -/ $\beta$ - $\text{TMB}_4\text{O}_7$  (TM = Zn, Hg),  $\text{CdB}_4\text{O}_7$ ,  $\text{Cd}_2\text{B}_2\text{O}_5$ , and  $\text{M}_3(\text{BO}_3)_2$  (M = Mg, Ca, Sr).

| Species                                                            | <i>s</i> | <i>p</i> | <i>d</i> | Total | Charge ( <i>e</i> ) | Bond | Population |
|--------------------------------------------------------------------|----------|----------|----------|-------|---------------------|------|------------|
| <b><math>\alpha</math>-<math>\text{Zn}_3(\text{BO}_3)_2</math></b> |          |          |          |       |                     |      |            |
| <b>Zn</b>                                                          | 0.33     | 0.59     | 9.98     | 10.90 | 1.10                | B-O  | 0.85       |
| <b>B</b>                                                           | 0.55     | 1.70     | 0.00     | 2.25  | 0.75                | Zn-O | 0.35       |
| <b>O</b>                                                           | 1.79     | 5.02     | 0.00     | 6.81  | -0.81               | /    | /          |
| <b><math>\beta</math>-<math>\text{Zn}_3(\text{BO}_3)_2</math></b>  |          |          |          |       |                     |      |            |
| <b>Zn</b>                                                          | 0.31     | 0.59     | 9.98     | 10.88 | 1.12                | B-O  | 0.85       |
| <b>B</b>                                                           | 0.55     | 1.71     | 0.00     | 2.26  | 0.75                | Zn-O | 0.33       |
| <b>O</b>                                                           | 1.78     | 5.02     | 0.00     | 6.81  | -0.81               | /    | /          |
| <b><math>\alpha</math>-<math>\text{ZnB}_4\text{O}_7</math></b>     |          |          |          |       |                     |      |            |
| <b>Zn</b>                                                          | 0.15     | 0.37     | 9.99     | 10.51 | 1.49                | B-O  | 0.71       |
| <b>B</b>                                                           | 0.52     | 1.56     | 0.00     | 2.07  | 0.93                | Zn-O | 0.23       |
| <b>O</b>                                                           | 1.74     | 5.01     | 0.00     | 6.74  | -0.74               | /    | /          |
| <b><math>\beta</math>-<math>\text{ZnB}_4\text{O}_7</math></b>      |          |          |          |       |                     |      |            |
| <b>Zn</b>                                                          | 0.02     | 0.44     | 9.99     | 10.46 | 1.54                | B-O  | 0.66       |
| <b>B</b>                                                           | 0.59     | 1.56     | 0.00     | 2.15  | 0.85                | Zn-O | 0.23       |
| <b>O</b>                                                           | 1.73     | 4.98     | 0.00     | 6.71  | -0.71               | /    | /          |
| <b><math>\alpha</math>-<math>\text{Cd}_3(\text{BO}_3)_2</math></b> |          |          |          |       |                     |      |            |
| <b>Cd</b>                                                          | 0.27     | 0.54     | 9.99     | 10.80 | 1.20                | B-O  | 0.84       |
| <b>B</b>                                                           | 0.60     | 1.72     | 0.00     | 2.32  | 0.68                | Cd-O | 0.15       |
| <b>O</b>                                                           | 1.81     | 5.01     | 0.00     | 6.83  | -0.83               | /    | /          |
| <b><math>\beta</math>-<math>\text{Cd}_3(\text{BO}_3)_2</math></b>  |          |          |          |       |                     |      |            |
| <b>Cd</b>                                                          | 0.30     | 0.50     | 9.99     | 10.79 | 1.21                | B-O  | 0.84       |
| <b>B</b>                                                           | 0.58     | 1.74     | 0.00     | 2.31  | 0.70                | Cd-O | 0.16       |
| <b>O</b>                                                           | 1.81     | 5.03     | 0.00     | 6.84  | -0.84               | /    | /          |
| <b><math>\text{Cd}_2\text{B}_2\text{O}_5</math></b>                |          |          |          |       |                     |      |            |
| <b>Cd</b>                                                          | 0.25     | 0.47     | 9.99     | 10.71 | 1.30                | B-O  | 0.83       |
| <b>B</b>                                                           | 0.54     | 1.69     | 0.00     | 2.23  | 0.77                | Cd-O | 0.32       |

|                                                         |          |          |          |              |                   |             |                   |
|---------------------------------------------------------|----------|----------|----------|--------------|-------------------|-------------|-------------------|
| <b>O</b>                                                | 1.78     | 5.05     | 0.00     | 6.82         | -0.82             | /           | /                 |
| <b>CdB<sub>4</sub>O<sub>7</sub></b>                     |          |          |          |              |                   |             |                   |
| <b>Cd</b>                                               | 0.10     | 0.28     | 9.99     | 10.37        | 1.63              | B-O         | 0.77              |
| <b>B</b>                                                | 0.52     | 1.56     | 0.00     | 2.08         | 0.92              | Cd-O        | 0.16              |
| <b>O</b>                                                | 1.74     | 5.02     | 0.00     | 6.76         | -0.76             | /           | /                 |
| <b>Hg<sub>3</sub>(BO<sub>3</sub>)<sub>2</sub></b>       |          |          |          |              |                   |             |                   |
| <b>Hg</b>                                               | 0.77     | 0.37     | 9.79     | 10.94        | 1.06              | B-O         | 0.85              |
| <b>B</b>                                                | 0.54     | 1.70     | 0.00     | 2.23         | 0.77              | Hg-O        | 0.24              |
| <b>O</b>                                                | 1.80     | 4.98     | 0.00     | 6.79         | -0.79             | /           | /                 |
| <b>Species</b>                                          | <b>s</b> | <b>p</b> | <b>d</b> | <b>Total</b> | <b>Charge (e)</b> | <b>Bond</b> | <b>Population</b> |
| <b><math>\alpha</math>-HgB<sub>4</sub>O<sub>7</sub></b> |          |          |          |              |                   |             |                   |
| <b>Hg</b>                                               | 0.33     | 0.29     | 9.96     | 10.59        | 1.41              | B-O         | 0.71              |
| <b>B</b>                                                | 0.52     | 1.55     | 0.00     | 2.06         | 0.94              | Hg-O        | 0.15              |
| <b>O</b>                                                | 1.74     | 5.00     | 0.00     | 6.74         | -0.74             | /           | /                 |
| <b><math>\beta</math>-HgB<sub>4</sub>O<sub>7</sub></b>  |          |          |          |              |                   |             |                   |
| <b>Hg</b>                                               | 0.26     | 0.32     | 9.99     | 10.57        | 1.43              | B-O         | 0.65              |
| <b>B</b>                                                | 0.58     | 1.57     | 0.00     | 2.15         | 0.86              | Hg-O        | 0.02              |
| <b>O</b>                                                | 1.73     | 4.96     | 0.00     | 6.69         | -0.69             | /           | /                 |
| <b>Mg<sub>3</sub>(BO<sub>3</sub>)<sub>2</sub></b>       |          |          |          |              |                   |             |                   |
| <b>Mg</b>                                               | 0.28     | 0.39     | 0.00     | 0.67         | 1.33              | B-O         | 0.85              |
| <b>B</b>                                                | 0.58     | 1.77     | 0.00     | 2.35         | 0.65              | Mg-O        | 0.19              |
| <b>O</b>                                                | 1.79     | 5.09     | 0.00     | 6.88         | -0.88             | /           | /                 |
| <b>Ca<sub>3</sub>(BO<sub>3</sub>)<sub>2</sub></b>       |          |          |          |              |                   |             |                   |
| <b>Ca</b>                                               | 2.14     | 6.00     | 0.56     | 8.70         | 1.30              | B-O         | 0.80              |
| <b>B</b>                                                | 0.51     | 1.71     | 0.00     | 2.22         | 0.78              | Ca-O        | 0.09              |
| <b>O</b>                                                | 1.80     | 5.11     | 0.00     | 6.91         | -0.91             | /           | /                 |
| <b>Sr<sub>3</sub>(BO<sub>3</sub>)<sub>2</sub></b>       |          |          |          |              |                   |             |                   |
| <b>Sr</b>                                               | 2.13     | 5.99     | 0.64     | 8.76         | 1.24              | B-O         | 0.80              |
| <b>B</b>                                                | 0.53     | 1.71     | 0.00     | 2.24         | 0.76              | Sr-O        | 0.09              |
| <b>O</b>                                                | 1.80     | 5.07     | 0.00     | 6.87         | -0.87             | /           | /                 |

**Table S4** Calculated dipole moment ( $P$ ), anisotropy polarizability ( $\Delta\alpha$ ), largest hyperpolarizability tensor ( $|\beta_{\max}|$ ) and HOMO-LUMO gap of B-O groups  $\text{BO}_3$ ,  $\text{BO}_4$ , and  $\text{B}_2\text{O}_5$ .

| Groups                 | $P_x, P_y, P_z$ | $\Delta\alpha$ (a.u.) | $ \beta_{\max} $ (a.u.) | HOMO-LUMO gap (eV) |
|------------------------|-----------------|-----------------------|-------------------------|--------------------|
| $\text{BO}_3$          | 0.0, 0.0, 0.0   | 7.2                   | 10.9                    | 8.2                |
| $\text{BO}_4$          | 0.0, 0.0, 0.0   | 1.0                   | 3.2                     | 10.9               |
| $\text{B}_2\text{O}_5$ | 0.0, 0.2, 0.0   | 17.5                  | 38.8                    | 8.2                |

**Table S5** Calculated Born effective charges of ternary borates  $\alpha$ -/ $\beta$ - $\text{TM}_3(\text{BO}_3)_2$  (TM = Zn, Cd),  $\text{Cd}_2\text{B}_2\text{O}_5$ , and  $\text{M}_3(\text{BO}_3)_2$  (M = Hg, Mg, Ca, Sr).

| Compounds                               | Atom | $q_{xx}$ | $q_{yy}$ | $q_{zz}$ | $\Delta q$ |
|-----------------------------------------|------|----------|----------|----------|------------|
| $\alpha$ - $\text{Zn}_3(\text{BO}_3)_2$ | Zn   | 2.23231  | 2.13125  | 2.18877  | 0.10106    |
|                                         | B    | 1.84455  | 1.86249  | 2.74494  | 0.90039    |
|                                         | O    | -1.73101 | -1.68646 | -2.00936 | -0.32290   |
| $\beta$ - $\text{Zn}_3(\text{BO}_3)_2$  | Zn   | 2.16634  | 2.18141  | 2.29710  | 0.13076    |
|                                         | B    | 1.11780  | 2.77683  | 2.51281  | 1.39501    |
|                                         | O    | -1.45577 | -2.01631 | -1.98616 | -0.56054   |
| $\alpha$ - $\text{Cd}_3(\text{BO}_3)_2$ | Cd   | 2.46920  | 2.34877  | 2.30707  | 0.16213    |
|                                         | B    | 0.96846  | 2.91669  | 2.48694  | 1.51848    |
|                                         | O    | -1.55742 | -2.14662 | -1.98252 | -0.58920   |
| $\beta$ - $\text{Cd}_3(\text{BO}_3)_2$  | Cd   | 2.39455  | 2.31806  | 2.31894  | 0.07649    |
|                                         | B    | 2.30816  | 1.48933  | 2.35802  | 0.86869    |
|                                         | O    | -1.96670 | -1.65548 | -1.94547 | -0.31122   |
| $\text{Cd}_2\text{B}_2\text{O}_5$       | Cd   | 2.42088  | 2.28868  | 2.40227  | 0.1322□0   |
|                                         | B    | 1.0401□0 | 2.98220  | 2.66980  | 1.9421□0   |
|                                         | O    | -1.38439 | -2.10835 | -2.02882 | -0.72396   |
| $\text{Hg}_3(\text{BO}_3)_2$            | Hg   | 2.15191  | 2.15196  | 1.51073  | 0.64123    |
|                                         | B    | 2.86827  | 2.86827  | 0.57078  | 2.29749    |
|                                         | O    | -2.03205 | -2.03207 | -0.94563 | -1.08644   |
| $\text{Mg}_3(\text{BO}_3)_2$            | Mg   | 2.04758  | 2.03041  | 2.13336  | 0.10295    |



|                                                   |           |          |          |          |          |
|---------------------------------------------------|-----------|----------|----------|----------|----------|
|                                                   | <b>B</b>  | 1.45514  | 2.31796  | 2.48557  | 1.03043  |
|                                                   | <b>O</b>  | -1.50884 | -1.78786 | -1.89520 | -0.38636 |
| <b>Ca<sub>3</sub>(BO<sub>3</sub>)<sub>2</sub></b> | <b>Ca</b> | 2.53682  | 2.53686  | 2.18309  | 0.35377  |
|                                                   | <b>B</b>  | 2.66062  | 2.66063  | 0.70002  | 1.96061  |
|                                                   | <b>O</b>  | -2.15529 | -2.14404 | -1.32489 | -0.83040 |
| <b>Sr<sub>3</sub>(BO<sub>3</sub>)<sub>2</sub></b> | <b>Sr</b> | 2.60832  | 2.60828  | 2.20663  | 0.40169  |
|                                                   | <b>B</b>  | 2.71211  | 2.71210  | 0.56448  | 2.14763  |
|                                                   | <b>O</b>  | -2.20820 | -2.20817 | -1.29147 | -0.91673 |

**Table S6** Calculated optical permittivity and polarisabilities ( $f \rightarrow \infty$ ) of ternary borates  $\alpha$ -/ $\beta$ - $\text{TM}_3(\text{BO}_3)_2$  (TM = Zn, Cd),  $\text{Cd}_2\text{B}_2\text{O}_5$ , and  $\text{M}_3(\text{BO}_3)_2$  (M = Hg, Mg, Ca, Sr).

| Compounds                                                    | Optical Permittivity ( $f \rightarrow \infty$ ) |                 |                 |                  | Optical Polarisabilities ( $f \rightarrow \infty$ ) |          |          |            |
|--------------------------------------------------------------|-------------------------------------------------|-----------------|-----------------|------------------|-----------------------------------------------------|----------|----------|------------|
|                                                              | $\epsilon_{xx}$                                 | $\epsilon_{yy}$ | $\epsilon_{zz}$ | $\Delta\epsilon$ | $P_{xx}$                                            | $P_{yy}$ | $P_{zz}$ | $\Delta P$ |
| $\alpha$ - <b>Zn<sub>3</sub>(BO<sub>3</sub>)<sub>2</sub></b> | 3.23                                            | 3.15            | 3.34            | 0.19             | 88.64                                               | 85.48    | 92.90    | 7.42       |
| $\beta$ - <b>Zn<sub>3</sub>(BO<sub>3</sub>)<sub>2</sub></b>  | 3.07                                            | 3.36            | 3.39            | 0.32             | 161.47                                              | 184.69   | 186.81   | 25.34      |
| $\alpha$ - <b>Cd<sub>3</sub>(BO<sub>3</sub>)<sub>2</sub></b> | 3.42                                            | 3.57            | 3.44            | 0.15             | 49.54                                               | 52.69    | 50.03    | 3.15       |
| $\beta$ - <b>Cd<sub>3</sub>(BO<sub>3</sub>)<sub>2</sub></b>  | 3.47                                            | 3.29            | 3.39            | 0.18             | 52.45                                               | 48.29    | 50.65    | 4.16       |
| <b>Cd<sub>2</sub>B<sub>2</sub>O<sub>5</sub></b>              | 3.04                                            | 3.26            | 3.36            | 0.32             | 33.95                                               | 37.67    | 39.25    | 5.30       |
| <b>Hg<sub>3</sub>(BO<sub>3</sub>)<sub>2</sub></b>            | 4.10                                            | 4.10            | 3.00            | 1.10             | 220.52                                              | 220.52   | 142.17   | 78.35      |
| <b>Mg<sub>3</sub>(BO<sub>3</sub>)<sub>2</sub></b>            | 2.74                                            | 2.74            | 2.81            | 0.07             | 28.23                                               | 28.28    | 29.41    | 1.18       |
| <b>Ca<sub>3</sub>(BO<sub>3</sub>)<sub>2</sub></b>            | 3.22                                            | 3.22            | 2.78            | 0.44             | 135.43                                              | 135.43   | 108.68   | 26.75      |
| <b>Sr<sub>3</sub>(BO<sub>3</sub>)<sub>2</sub></b>            | 3.17                                            | 3.17            | 2.72            | 0.45             | 153.71                                              | 153.71   | 121.93   | 31.78      |

**Table S7** The  $\text{BO}_3$  groups density (N/V) of ternary borates  $\alpha$ -/ $\beta$ - $\text{TM}_3(\text{BO}_3)_2$  (TM = Zn, Cd),  $\text{Cd}_2\text{B}_2\text{O}_5$ ,

and  $M_3(BO_3)_2$  ( $M = \text{Hg, Mg, Ca, Sr}$ ).

| Compounds                         | Number of $BO_3$ in cell (N) | Cell volume ( $\text{\AA}^3$ ) (V) | Density of $BO_3$ groups |
|-----------------------------------|------------------------------|------------------------------------|--------------------------|
| $\alpha\text{-Zn}_3(BO_3)_2$      | 8                            | 498.73                             | $1.60 \times 10^{-2}$    |
| $\beta\text{-Zn}_3(BO_3)_2$       | 16                           | 981.67                             | $1.63 \times 10^{-2}$    |
| $\alpha\text{-Cd}_3(BO_3)_2$      | 6                            | 257.41                             | $2.33 \times 10^{-2}$    |
| $\beta\text{-Cd}_3(BO_3)_2$       | 4                            | 266.33                             | $1.50 \times 10^{-2}$    |
| $\text{Cd}_2\text{B}_2\text{O}_5$ | 4                            | 209.36                             | $1.91 \times 10^{-2}$    |
| $\text{Hg}_3(BO_3)_2$             | 24                           | 894.05                             | $2.68 \times 10^{-2}$    |
| $\text{Mg}_3(BO_3)_2$             | 6                            | 204.30                             | $2.94 \times 10^{-2}$    |
| $\text{Ca}_3(BO_3)_2$             | 24                           | 765.61                             | $3.13 \times 10^{-2}$    |
| $\text{Sr}_3(BO_3)_2$             | 24                           | 889.93                             | $2.70 \times 10^{-2}$    |

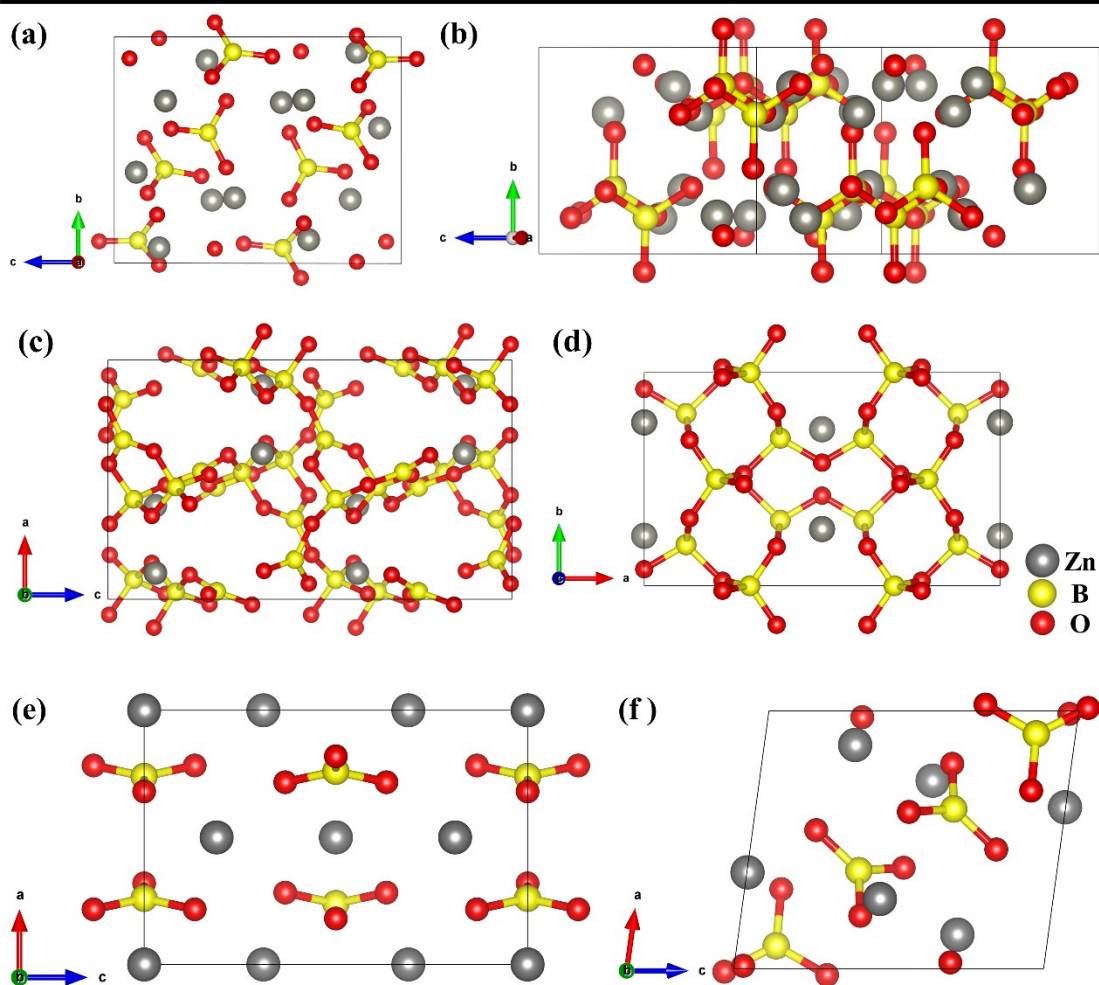

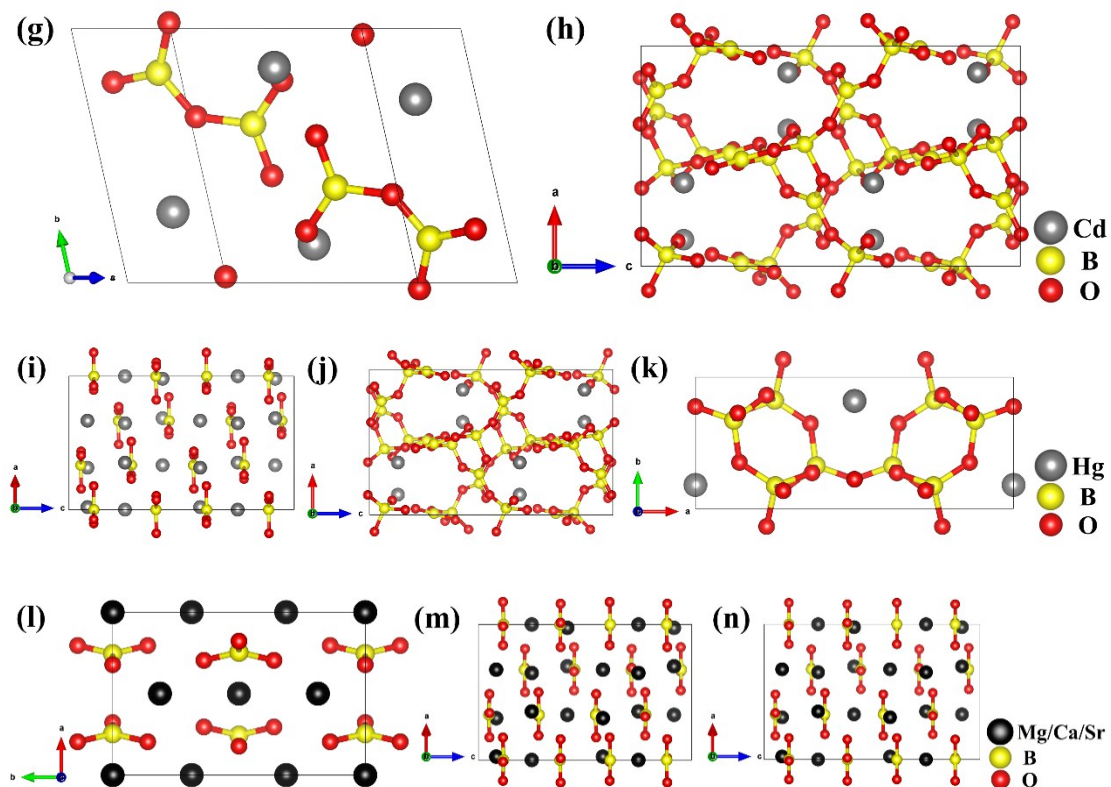

**Figure S1** Crystal structures of ternary borates  $\alpha\text{-Zn}_3(\text{BO}_3)_2$  (a),  $\beta\text{-Zn}_3(\text{BO}_3)_2$  (b),  $\alpha\text{-ZnB}_4\text{O}_7$  (c),  $\beta\text{-ZnB}_4\text{O}_7$  (d),  $\alpha\text{-Cd}_3(\text{BO}_3)_2$  (e),  $\beta\text{-Cd}_3(\text{BO}_3)_2$  (f),  $\text{Cd}_2\text{B}_2\text{O}_5$  (g),  $\text{CdB}_4\text{O}_7$  (h),  $\text{Hg}_3(\text{BO}_3)_2$  (i),  $\alpha\text{-HgB}_4\text{O}_7$  (j),  $\beta\text{-HgB}_4\text{O}_7$  (k), and  $\text{M}_3(\text{BO}_3)_2$  (M = Mg, Ca, Sr) (l-n).

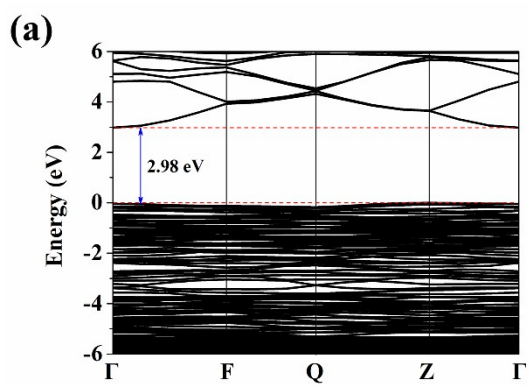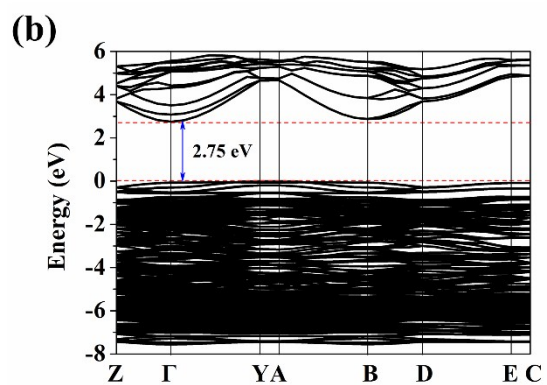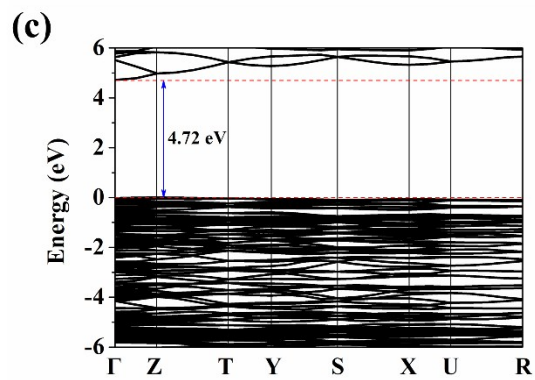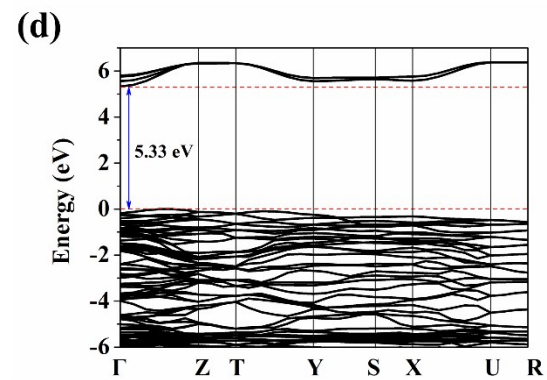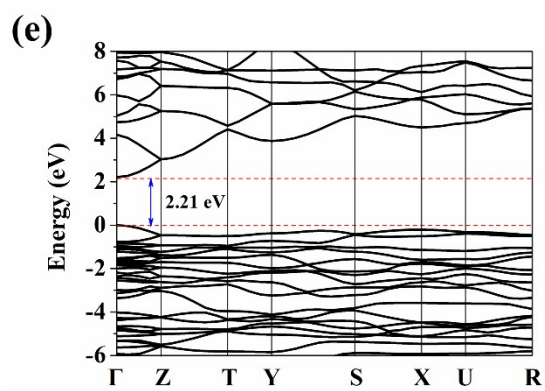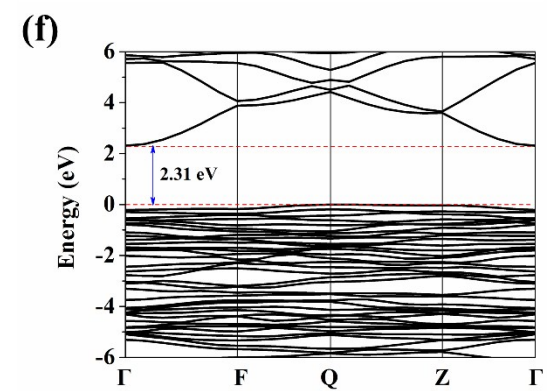

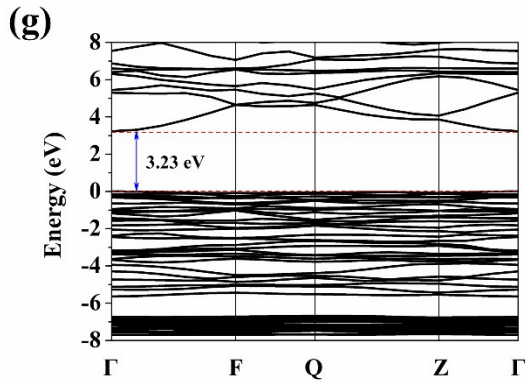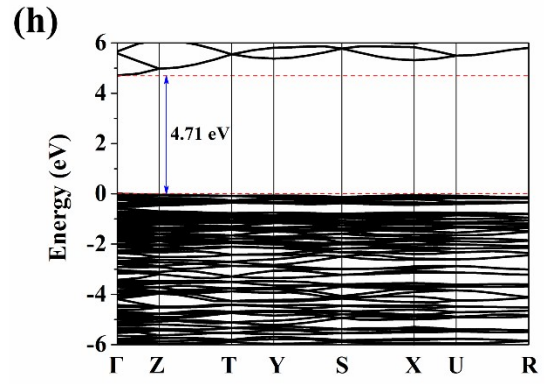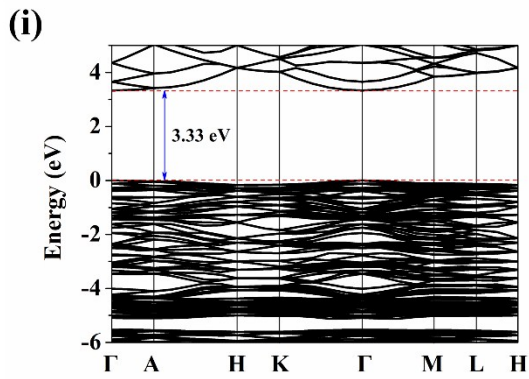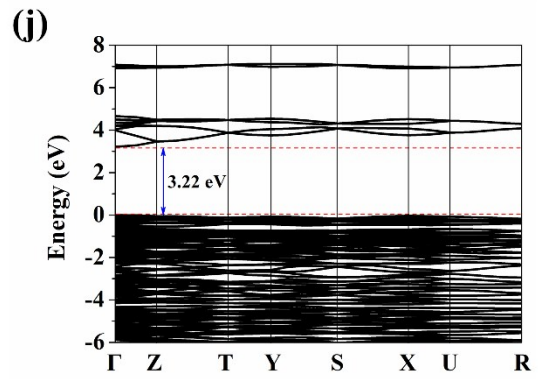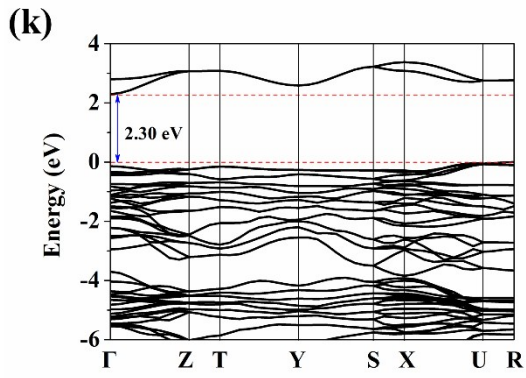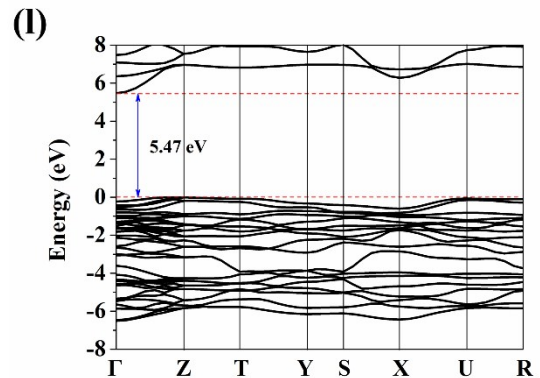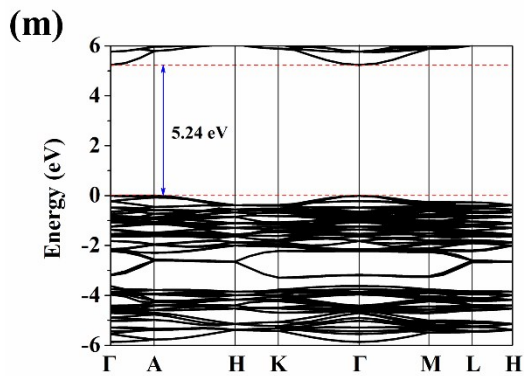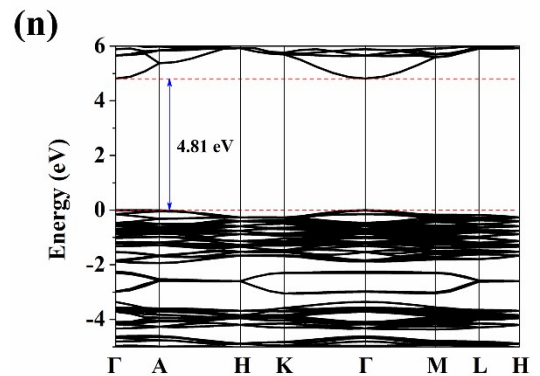

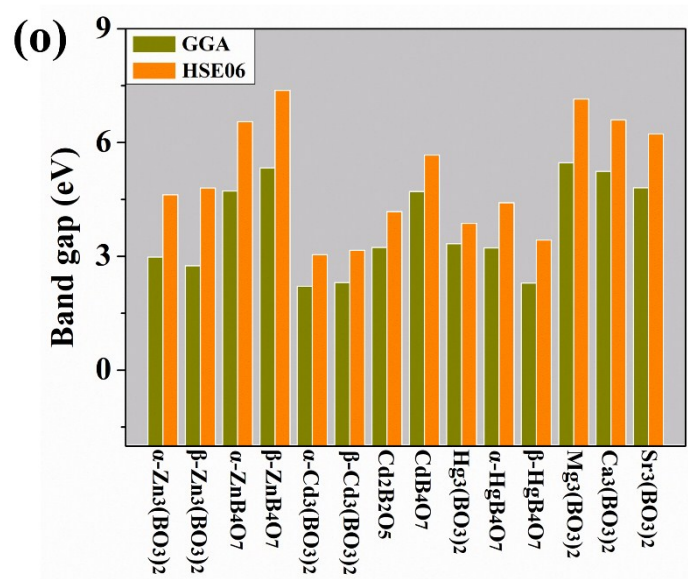

**Figure S2** Calculated band structures for ternary borates  $\alpha$ -Zn<sub>3</sub>(BO<sub>3</sub>)<sub>2</sub> (a),  $\beta$ -Zn<sub>3</sub>(BO<sub>3</sub>)<sub>2</sub> (b),  $\alpha$ -ZnB<sub>4</sub>O<sub>7</sub> (c),  $\beta$ -ZnB<sub>4</sub>O<sub>7</sub> (d),  $\alpha$ -Cd<sub>3</sub>(BO<sub>3</sub>)<sub>2</sub> (e),  $\beta$ -Cd<sub>3</sub>(BO<sub>3</sub>)<sub>2</sub> (f), Cd<sub>2</sub>B<sub>2</sub>O<sub>5</sub> (g), CdB<sub>4</sub>O<sub>7</sub> (h), Hg<sub>3</sub>(BO<sub>3</sub>)<sub>2</sub> (i),  $\alpha$ -HgB<sub>4</sub>O<sub>7</sub> (j),  $\beta$ -HgB<sub>4</sub>O<sub>7</sub> (k), and M<sub>3</sub>(BO<sub>3</sub>)<sub>2</sub> (M = Mg, Ca, Sr) (l-n) by GGA functional, all of borates calculated band gaps by the GGA and HSE06 functional (o).



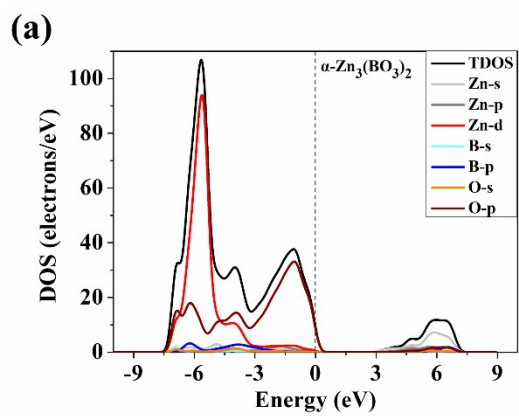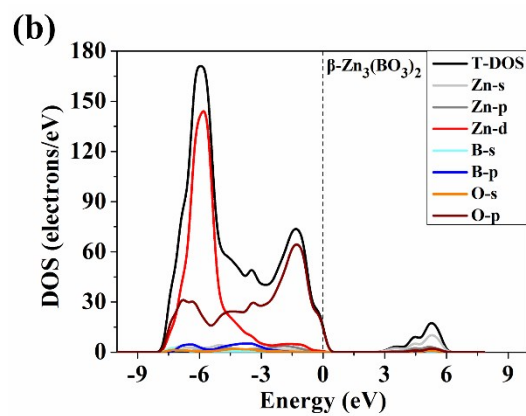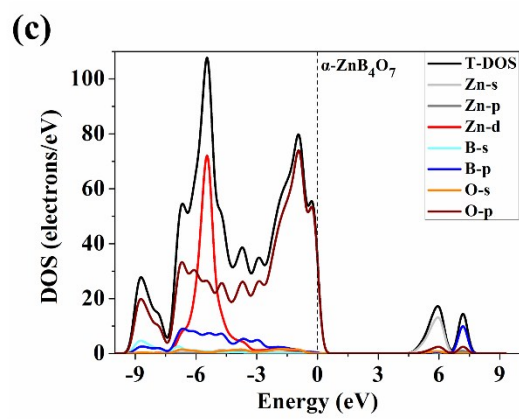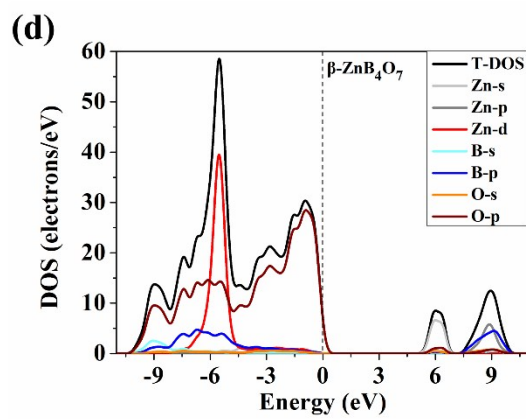

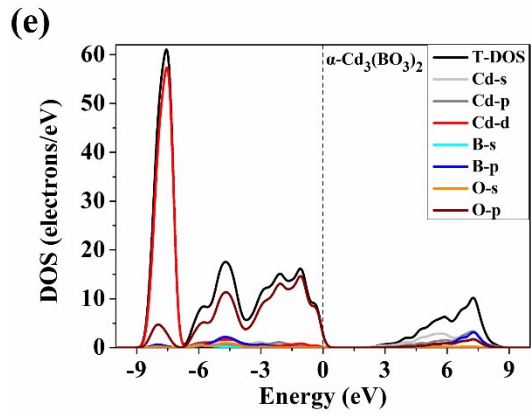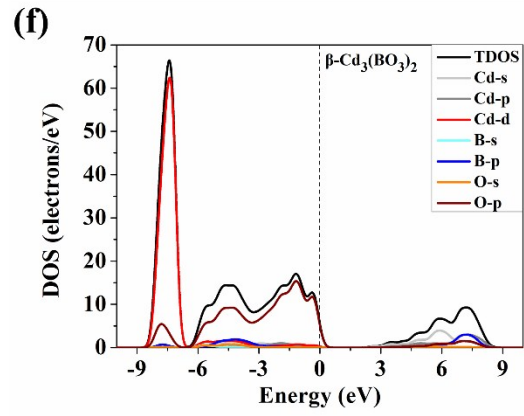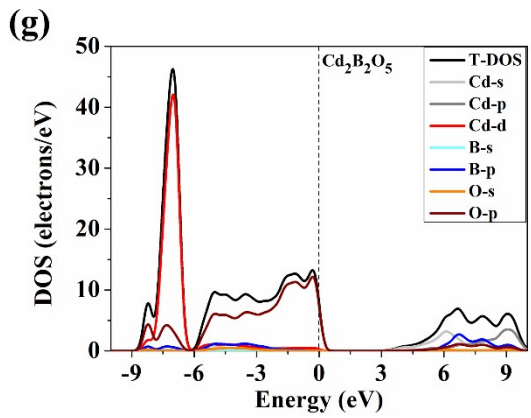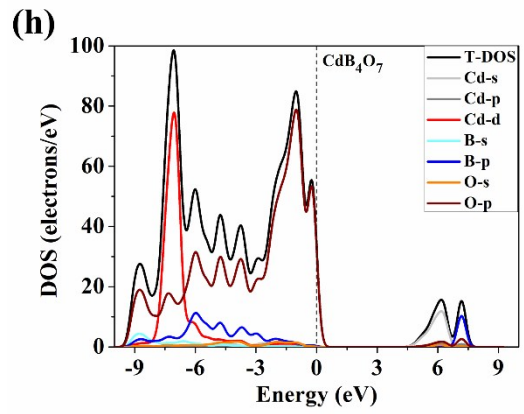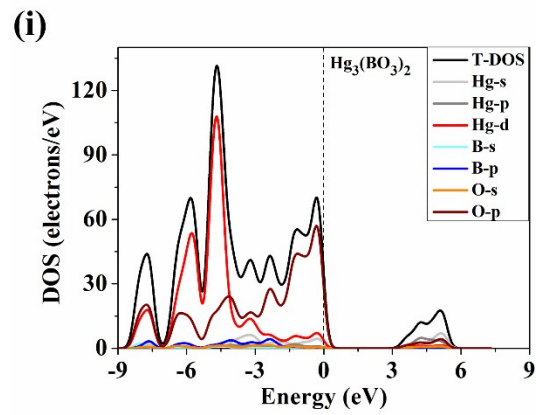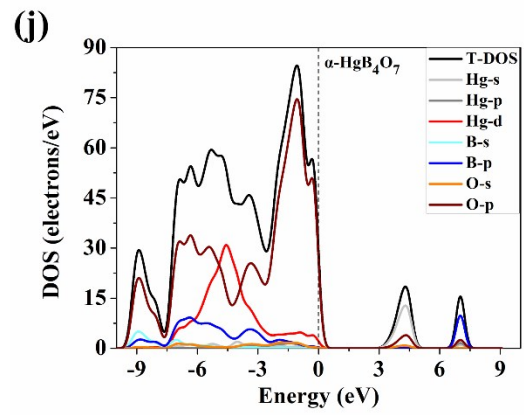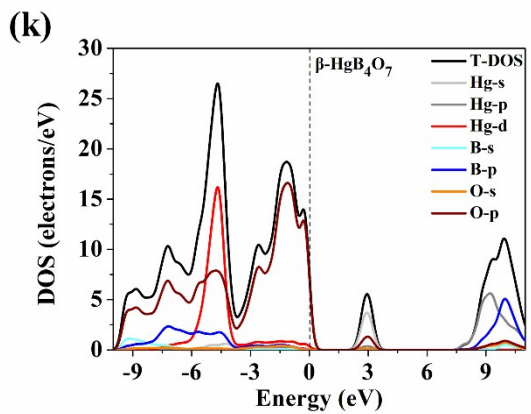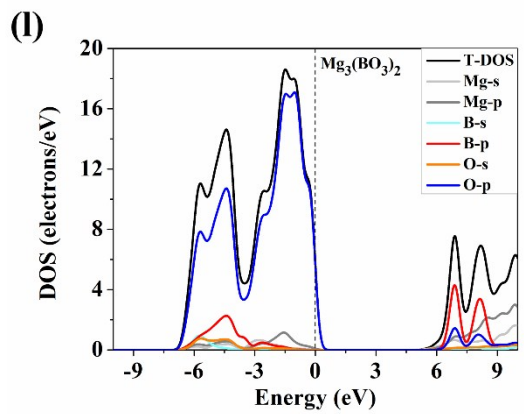



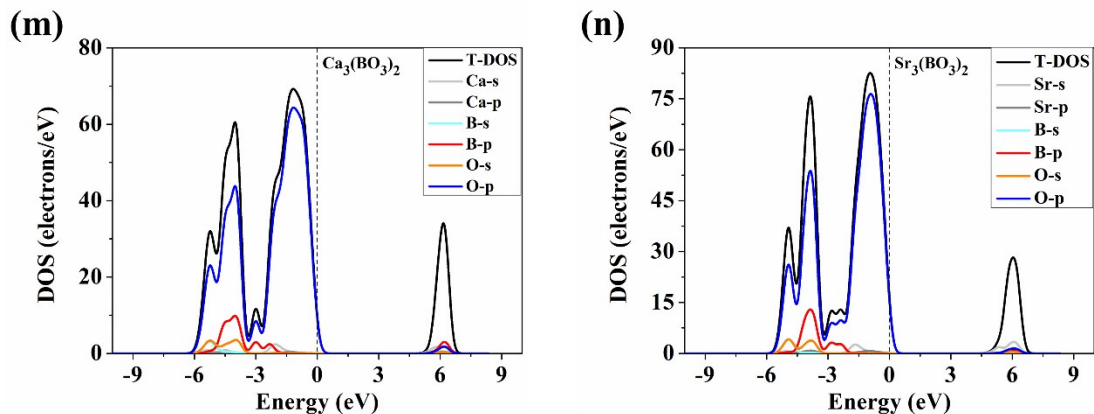

**Figure S3** Density/partial density of states of ternary borates  $\alpha\text{-Zn}_3(\text{BO}_3)_2$  (a),  $\beta\text{-Zn}_3(\text{BO}_3)_2$  (b),  $\alpha\text{-ZnB}_4\text{O}_7$  (c),  $\beta\text{-ZnB}_4\text{O}_7$  (d),  $\alpha\text{-Cd}_3(\text{BO}_3)_2$  (e),  $\beta\text{-Cd}_3(\text{BO}_3)_2$  (f),  $\text{Cd}_2\text{B}_2\text{O}_5$  (g),  $\text{CdB}_4\text{O}_7$  (h),  $\text{Hg}_3(\text{BO}_3)_2$  (i),  $\alpha\text{-HgB}_4\text{O}_7$  (j),  $\beta\text{-HgB}_4\text{O}_7$  (k), and  $\text{M}_3(\text{BO}_3)_2$  ( $\text{M} = \text{Mg}, \text{Ca}, \text{Sr}$ ) (l-n).

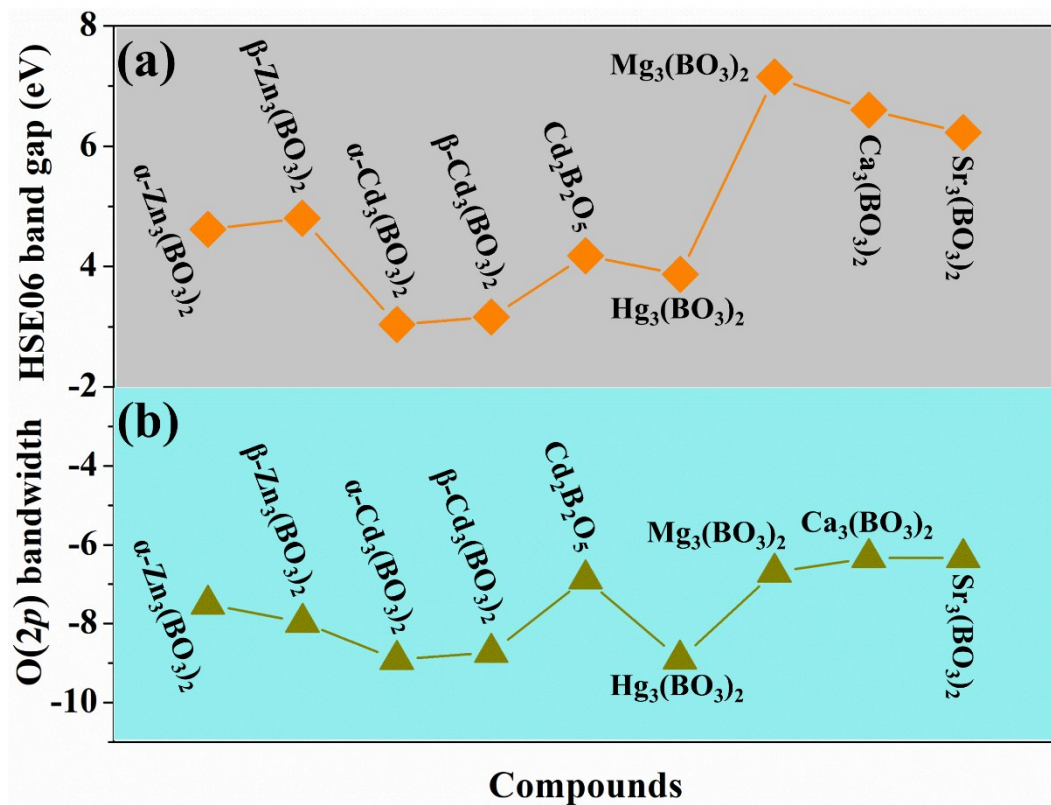

**Figure S4** Ternary borates  $\alpha\text{-}\beta\text{-TM}_3(\text{BO}_3)_2$  ( $\text{TM} = \text{Zn}, \text{Cd}$ ),  $\text{Cd}_2\text{B}_2\text{O}_5$ , and  $\text{M}_3(\text{BO}_3)_2$  ( $\text{M} = \text{Hg}, \text{Mg}, \text{Ca}, \text{Sr}$ ).

Sr): compared with the HSE06 band gaps (a) and O ( $2p$ ) bandwidth (b).

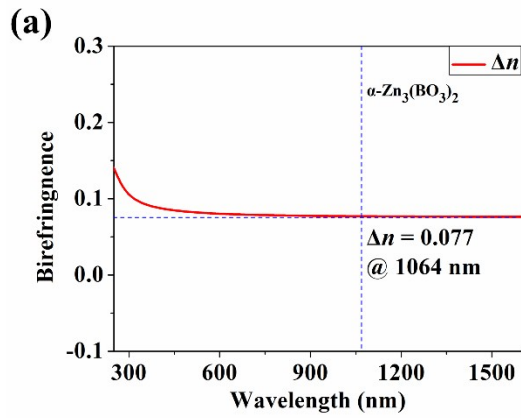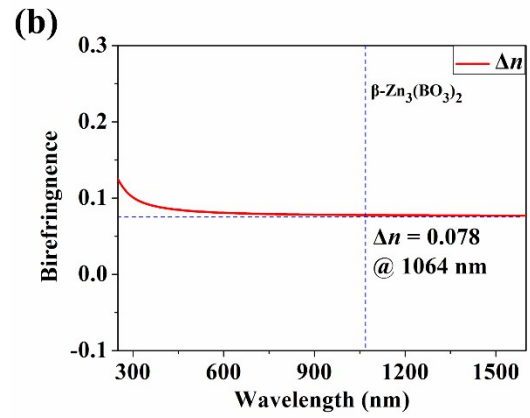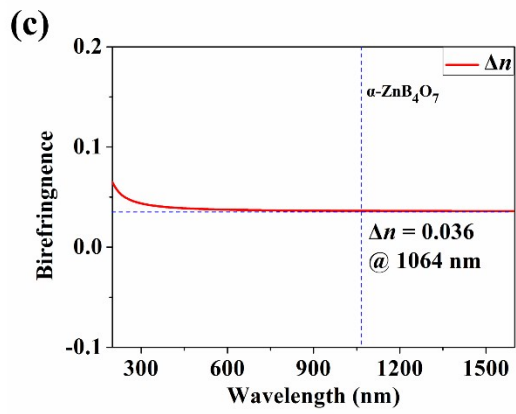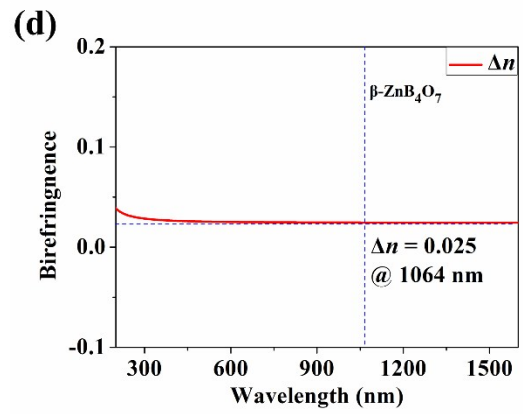

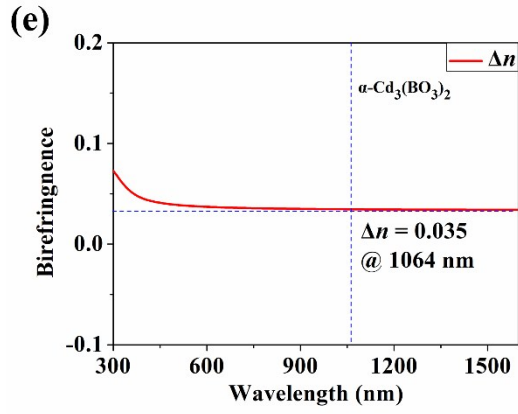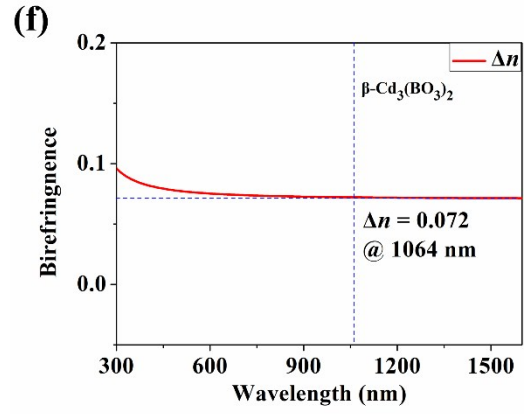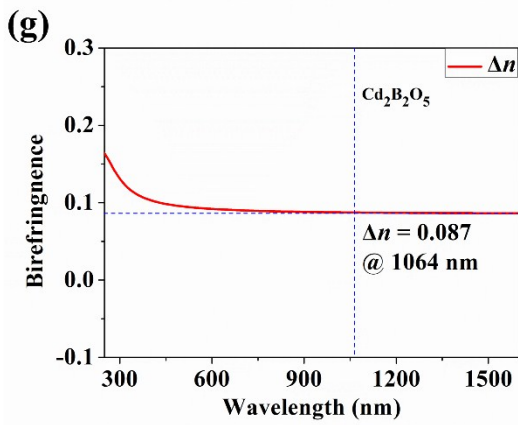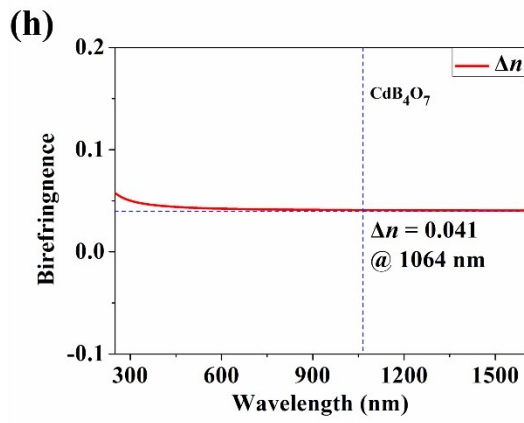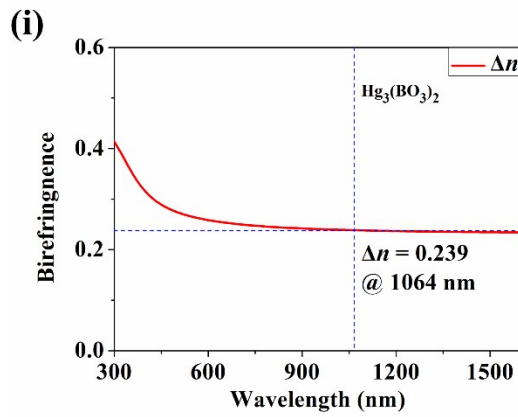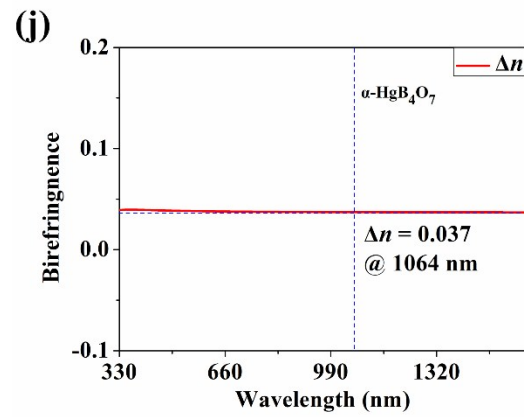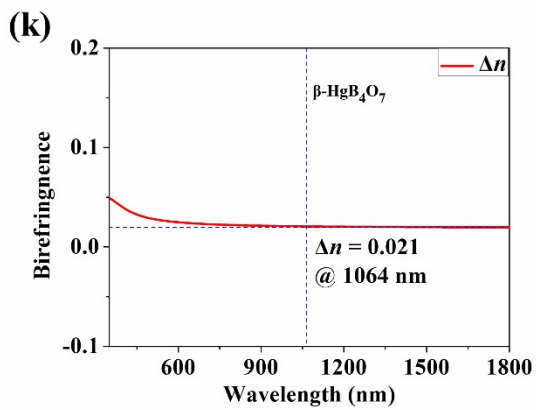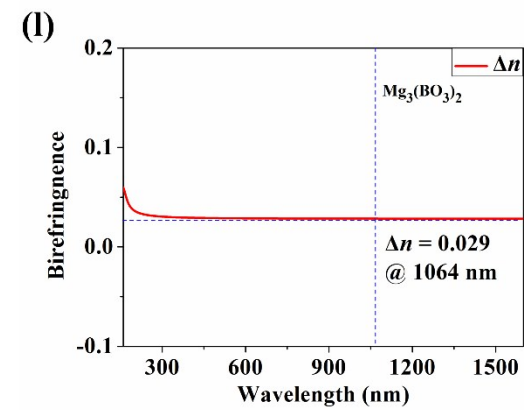

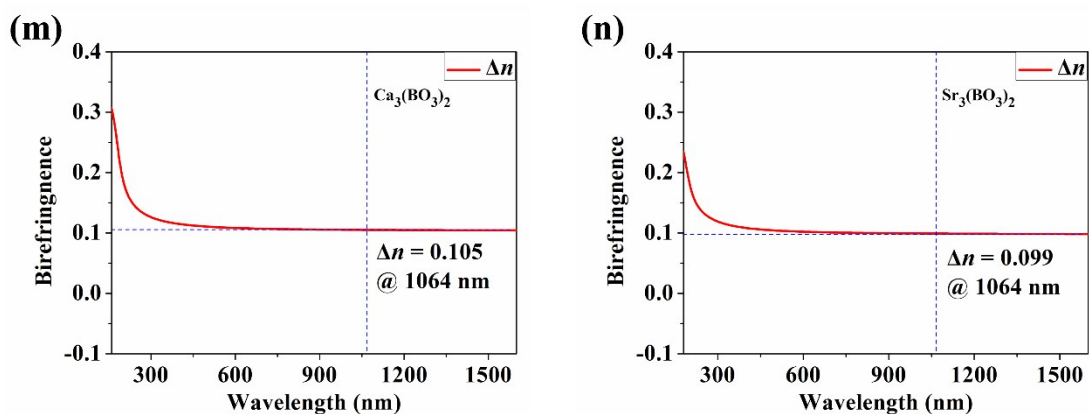

**Figure S5** Calculated birefringence  $\Delta n$  of ternary borates  $\alpha$ - $\text{Zn}_3(\text{BO}_3)_2$  (a),  $\beta$ - $\text{Zn}_3(\text{BO}_3)_2$  (b),  $\alpha$ - $\text{ZnB}_4\text{O}_7$  (c),  $\beta$ - $\text{ZnB}_4\text{O}_7$  (d),  $\alpha$ - $\text{Cd}_3(\text{BO}_3)_2$  (e),  $\beta$ - $\text{Cd}_3(\text{BO}_3)_2$  (f),  $\text{Cd}_2\text{B}_2\text{O}_5$  (g),  $\text{CdB}_4\text{O}_7$  (h),  $\text{Hg}_3(\text{BO}_3)_2$  (i),  $\alpha$ - $\text{HgB}_4\text{O}_7$  (j),  $\beta$ - $\text{HgB}_4\text{O}_7$  (k), and  $\text{M}_3(\text{BO}_3)_2$  ( $\text{M} = \text{Mg}, \text{Ca}, \text{Sr}$ ) (l-n).

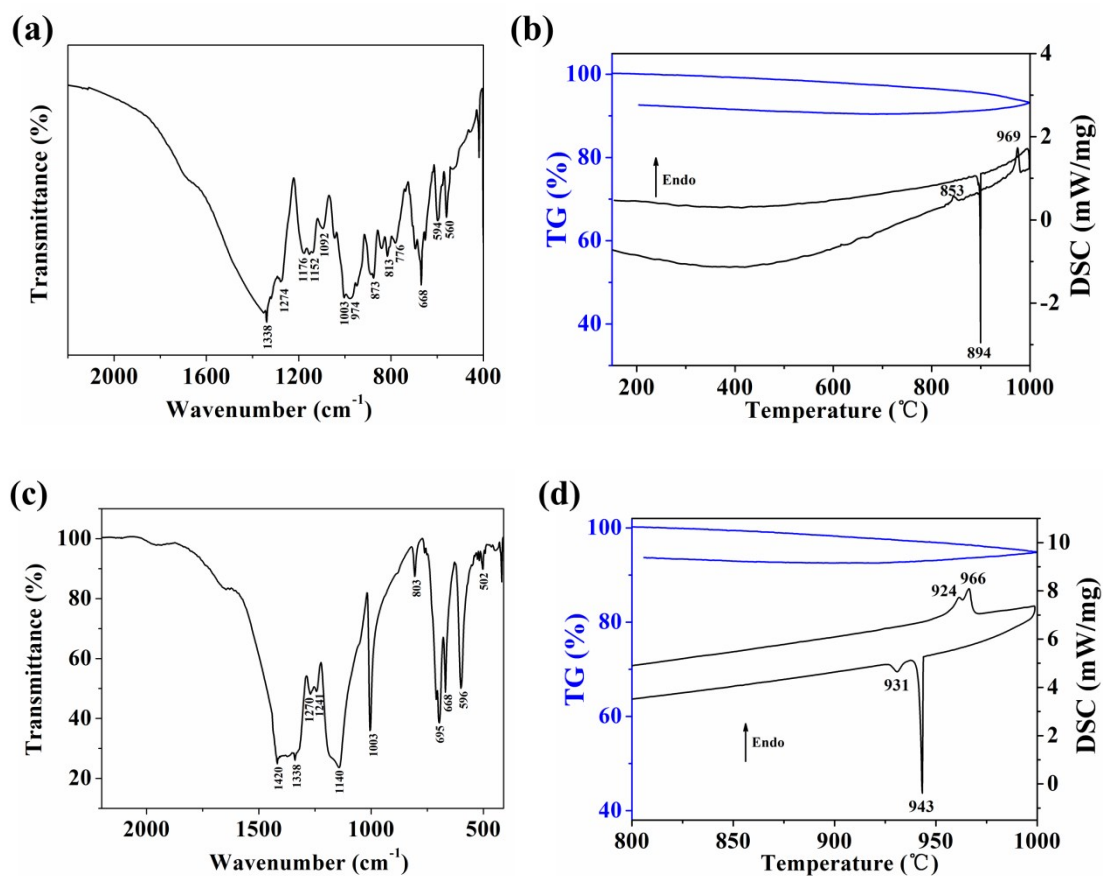

**Figure S6** Borates  $\alpha$ - $\text{Cd}_3(\text{BO}_3)_2$  and  $\text{Cd}_2\text{B}_2\text{O}_5$ : IR spectra and thermal analysis. (a) and (b) are IR and thermal of  $\alpha$ - $\text{Cd}_3(\text{BO}_3)_2$ , (c) and (d) are those of  $\text{Cd}_2\text{B}_2\text{O}_5$ .

To further determine the coordination of B atoms of  $\alpha$ - $\text{Cd}_3\text{B}_2\text{O}_6$ , the IR spectrum is measured within range of wavenumber from 400 to 4000  $\text{cm}^{-1}$  (Figure S6a) and the polycrystalline samples were mixed

with dried KBr in a molar ratio of 1:100 approximately. According to Figure S6a, the strong peaks at the range of 1338 to 1003  $\text{cm}^{-1}$  are ascribed to antisymmetric stretch of  $\text{BO}_3$  groups while other peaks below 974  $\text{cm}^{-1}$  mainly from the bending mode of  $\text{BO}_3$  units. The results are in accordance with other compounds containing  $\text{BO}_3$  anionic groups. In order to evaluate the thermal stability of  $\alpha\text{-Cd}_3\text{B}_2\text{O}_6$ , thermal gravimetric (TG) analysis and differential scanning calorimetry (DSC) data are collected at the temperature range of 40 to 1000  $^\circ\text{C}$ . The TGA and DSC curves of  $\alpha\text{-Cd}_3\text{B}_2\text{O}_6$  are shown in the Figure S6b, and blue line is the TG curve. It can be seen there is a weight loss about 5% in the heating and cooling process. This loss may attribute to the decomposition of boron at high temperature. Black line represents the DSC curve, and it shows two endothermic peaks at 853 and 969  $^\circ\text{C}$  in the heating process, and one exothermic peak at around 894  $^\circ\text{C}$  in the cooling process.

The IR spectrum of  $\text{Cd}_2\text{B}_2\text{O}_5$  depicts in Figure S6c, and the peaks from 1420 to 1241  $\text{cm}^{-1}$  and 1140 to 1003  $\text{cm}^{-1}$  can be assigned to the asymmetric and symmetric stretching vibrations of the  $\text{BO}_3$  groups, respectively. The peaks below 803  $\text{cm}^{-1}$  are caused by the distortion modes. The Figure S6d reveals the TG and DSC curves. The blue line is TG curve, and there are about 5% weight loss in the process of heating and cooling. The black line represents the DSC curve, and there is one endothermic peak at 966  $^\circ\text{C}$  in the heating curve and two exothermic peaks at 943 and 931  $^\circ\text{C}$  in the cooling curve.

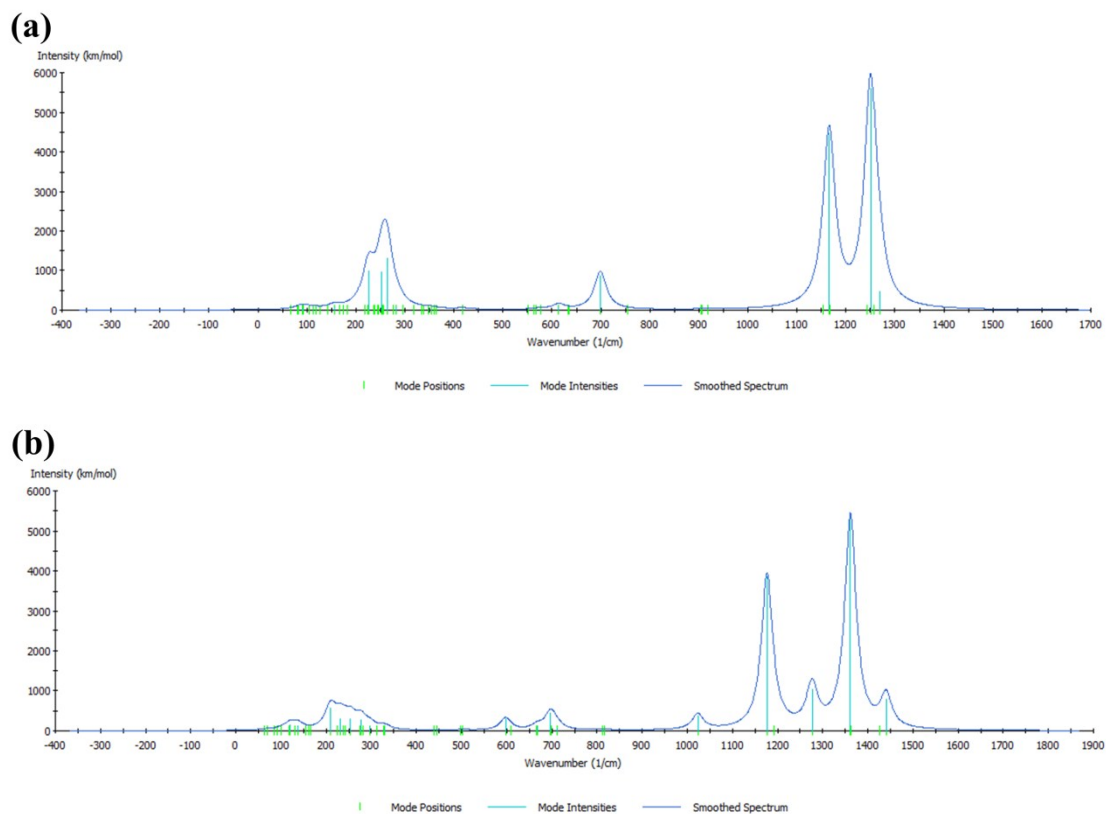

**Figure S7** Calculated IR spectra of  $\alpha$ - $\text{Cd}_3(\text{BO}_3)_2$  (a) and  $\text{Cd}_2\text{B}_2\text{O}_5$  (b).

## Reference

- [1] J. Kang, Q. Jing, Y. Yang, S. L. Pan and Z. H. Yang, *Mater. Focus*, 2015, **4**, 50-57.
- [2] P. S. Verdier and S. G. Blanco, *Z. Kristallogr.*, 1980, **151**, 175-177.
- [3] W. T. A. Harrison, T. E. Gier and G. D. Stucky, *Angew. Chem. Int. Ed.*, 1993, **105**, 788-790.
- [4] B. Winkler, A. G. C. Guzman, L. Wiehl, L. Bayarjargal and V. Milman, *Solid State Sci.*, 2012, **14**, 1080-1085.
- [5] H. Huppertz and G. Heymann, *Solid State Sci.*, 2003, **5**, 281-289.
- [6] X. A. Chen, H. P. Xue, X. N. Chang, L. Zhang, Y. H. Zhao, J. L. Zuo, H. G. Zang and W. Q. Xiao, *J. Alloys Compd.*, 2006, **425**, 96-100.
- [7] Y. R. Shi, Y. Wen, M. D. Que, G. Zhu and Y. H. Wang, *Dalton Trans.*, 2014, **43**, 2418-2423.
- [8] J. S. Knyrim, H. Emme, M. Döblinger, O. Oeckler, M. Weil and H. Huppertz, *Chem. Eur. J.*, 2008, **14**, 6149-6154.
- [9] M. Ihara and J. K. Moe, *Acta Crystallogr.*, 1966, **20**, 132-134.
- [10] Y. H. Zhao, X. A. Chen, X. A. Chang, J. L. Zuo and M. Li, *Acta Crystallogr.*, 2007, **E63**, i50-i52.
- [11] X. W. Zhang, H. W. Yu, H. P. Wu, S. L. Pan, A. Q. Jiao, B. B. Zhang and Z. H. Yang, *RSC Adv.*, 2014, **4**, 13195-13200.
- [12] M. Weil, *Z. Kristallogr. NCS*, 2003, **218**, 155-156.
- [13] M. Weil, *Acta Crystallogr.*, 2003, **E59**, i40-i42.
- [14] H. Emme, M. Wei and H. Huppertz, *Z. Naturforsch.*, 2005, **60**, 815-820.
- [15] B. Bashir, B. B. Zhang, S. L. Pan and Z. H. Yang, *J. Alloys Compd.*, 2018, **758**, 85-90.
